# Supplementary material for: Immunohistochemical over expression of p53 in head and neck Squamous cell carcinoma: clinical and prognostic significance
Source: PubMed Central journal article supplement (PMC6029369; doi:10.1186/s13104-018-3547-7), 2018-07-03

A) p53 positive (3+ >90% cells)

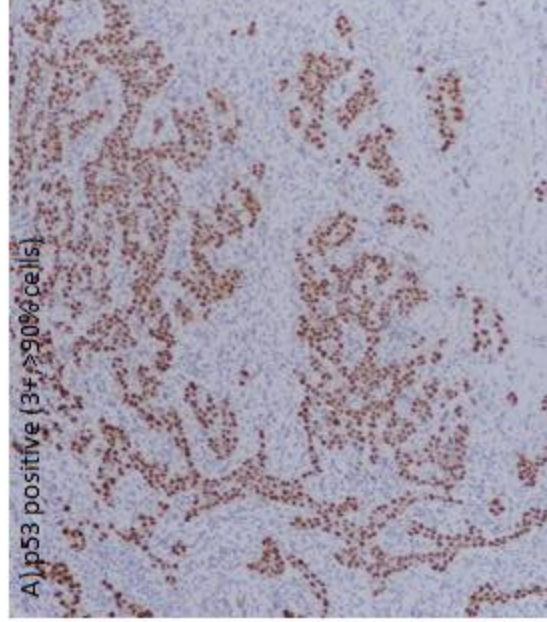

B) p53 negative

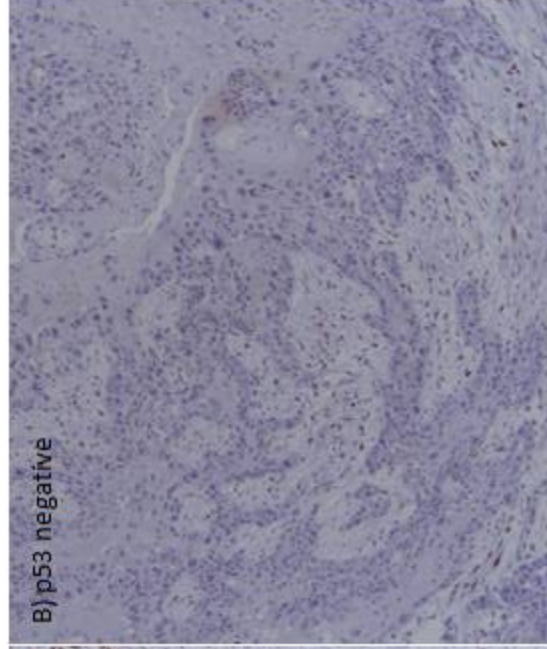

Supplement: 13104_2018_3547_MOESM1_ESM.pdf [file 13104_2018_3547_MOESM1_ESM.pdf]
